# Supplementary material
Source: PubMed Central journal article supplement (PMC2879346)
Supplement: NIHMS205134-supplement-Suppl_Info.pdf [file NIHMS205134-supplement-Suppl_Info.pdf]

Supporting Material for

**Cloning and Characterization of the Ravidomycin and Chrysomycin  
Biosynthetic Gene Clusters**

Madan K. Kharel,<sup>#</sup> S. Eric Nybo,<sup>#</sup> Micah D. Shepherd,<sup>#</sup> and Jürgen Rohr\*

[\*] *Dr. Madan K. Kharel, S. Eric Nybo, Micah D. Shepherd, Prof. Dr. J. Rohr, Department of Pharmaceutical Sciences, College of Pharmacy, University of Kentucky, 725 Rose Street, Lexington, KY 40536-0082 (USA); Fax: (+1) 859-257-7564; E-mail: [jrohr2@email.uky.edu](mailto:jrohr2@email.uky.edu)*

**List of contents:**

|                                                                                                 |     |
|-------------------------------------------------------------------------------------------------|-----|
| Table S1. ORFs and proposed function of corresponding enzymes                                   | S3  |
| Table S2. ORFs and proposed function of corresponding enzymes                                   | S4  |
| Table S3. Bacterial strains and the plasmids used in this study                                 | S6  |
| Table S4. Oligo primers used in this study                                                      | S7  |
| <sup>1</sup> H and <sup>13</sup> C NMR data of deacetylravidomycin E ( <b>31</b> )              | S8  |
| Figure S1 HPLC analyses of the compounds                                                        | S9  |
| Figure S2. HPLC analyses of the metabolites                                                     | S10 |
| Figure S3 Multiple sequence alignment of 4,6-dehydratases used for designing degenerate primers | S11 |
| References                                                                                      | S11 |

**Table S1.** ORFs and proposed function of corresponding enzymes

| ORFs           | Size <sup>[a]</sup> | ID/SM (%) <sup>[b]</sup> | Closest homologue of corresponding enzyme | Protein accession no. | Proposed function                             |
|----------------|---------------------|--------------------------|-------------------------------------------|-----------------------|-----------------------------------------------|
| <i>ravX</i>    | 106                 | 94/100                   | PaaB, <i>S. clavuligerus</i>              | ZP_03184882           | Phenylacetic acid degradation protein         |
| <i>ravX1</i>   | 325                 | 92/94                    | PaaA, <i>S. clavuligerus</i>              | ZP_03184883           | Phenylacetate-CoA oxygenase                   |
| <i>ravX2</i>   | 270                 | 65/79                    | <i>S. pristinaespiralis</i>               | YP_002198855          | Unknown                                       |
| <i>ravX3</i>   | 65                  | -                        | -                                         | -                     | Hypothetical protein                          |
| <i>ravF</i>    | 261                 | 77/87                    | SimA6, <i>S. antibioticus</i>             | AAK06787              | Ketoreductase                                 |
| <i>ravX4</i>   | 161                 | 66/79                    | <i>S. griseus</i>                         | YP_001826336          | Regulatory protein                            |
| <i>ravV</i>    | 107                 | 30/48                    | GilV, <i>S. griseoflavus</i>              | ABE03981              | Hypothetical protein                          |
| <i>ravH</i>    | 189                 | 55/67                    | GilH, <i>S. griseoflavus</i>              | AAP69587              | NADPH-dependent FMN reductase                 |
| <i>ravOI</i>   | 503                 | 57/67                    | JadH, <i>S. venezuelae</i>                | AAV52248              | Bifunctional monooxygenase-dehydratase        |
| <i>ravG</i>    | 108                 | 76/83                    | schP9, <i>S. sp. SCC 2136</i>             | CAH10118              | Cyclase                                       |
| <i>ravC1</i>   | 82                  | 68/79                    | KinC, <i>S. murayamaensis</i>             | AAO65348              | Acyl carrier protein                          |
| <i>ravK</i>    | 315                 |                          | Ovma, <i>S. antibioticus</i>              | CAG14969              | Aromatase/cyclase                             |
| <i>ravOIV</i>  | 520                 | 48/58                    | LndM2, <i>S. globisporus</i>              | AAT64432              | Monooxygenase                                 |
| <i>ravA</i>    | 423                 | 79/86                    | UrdA, <i>S. fradiae</i>                   | CAA60569              | Ketoacyl synthase $\alpha$ (KS $\alpha$ )     |
| <i>ravB</i>    | 401                 | 71/84                    | <i>S. venezuelae</i>                      | AAB36563              | Ketoacyl synthase $\beta$ (KS $\beta$ )       |
| <i>ravC</i>    | 86                  | 62/75                    | <i>S. venezuelae</i>                      | AAB36564              | Acyl carrier protein                          |
| <i>ravOIII</i> | 394                 | 70/80                    | GilOIII, <i>S. griseoflavus</i>           | AAP69584              | Cytochrome P-450 monooxygenase                |
| <i>ravY</i>    | 72                  | 43/63                    | <i>Nocardia farcinica</i> IFM 10152       | YP_116742             | Ferredoxin                                    |
| <i>ravP</i>    | 323                 | 51/64                    | PgaH, <i>S. sp. PGA64</i>                 | AAK57533              | Malonyl-CoA acyl carrier protein transacylase |
| <i>ravQ</i>    | 330                 | 45/55                    | AknF, <i>S. galilaeus</i>                 | BAB72049              | Acyltransferase                               |
| <i>ravJ</i>    | 289                 | 42/53                    | SchP11, <i>S. sp. SCC 2136</i>            | CAH10120              | Unknown                                       |

|               |                       |        |                                      |              |                                          |
|---------------|-----------------------|--------|--------------------------------------|--------------|------------------------------------------|
| <i>ravX5</i>  | 202                   | 56/74  | <i>S. violaceoruber</i>              | CAA09631     | Regulatory protein                       |
| <i>ravE</i>   | 328                   | 77/85  | <i>S. sviveus</i>                    | YP_002205670 | NDP-glucose 4,6-dehydratase              |
| <i>ravD</i>   | 355                   | 79/88  | <i>S. sviveus</i>                    | YP_002205669 | NDP-glucose synthase                     |
| <i>ravX6</i>  | 55                    | -      | -                                    | -            | Hypothetical protein                     |
| <i>ravGT</i>  | 379                   | 46/66  | GilGT, <i>S. griseoflavus</i>        | AAP69578     | C-glycosyltransferase                    |
| <i>ravNMT</i> | 265                   | 56/71  | SnogX, <i>S. nogalater</i>           | CAA12020     | N,N-dimethyltransferase                  |
| <i>ravIM</i>  | 156                   | 47/69  | <i>Burkholderia phymatum</i>         | YP_001858530 | NDP-6-deoxy-3, 4-keto-hexulose isomerase |
| <i>ravAMT</i> | 369                   | 60/75  | <i>Saccharopolyspora erythraea</i>   | YP_001103001 | Aminotransferase                         |
| <i>ravMT</i>  | 339                   | 51/66  | <i>S. tubercidicus</i>               | AAT45298     | O-methyltransferase                      |
| <i>ravOII</i> | 231                   | 68/77  | GilOII, <i>S. griseoflavus</i>       | AAP69583     | Anthrone Monooxygenase                   |
| <i>ravRM</i>  | 776                   |        |                                      |              |                                          |
|               | N-terminal<br>535 aa, | 54/67; | <i>S. galilaeus</i>                  | ABI15166     | Dehydrogenase                            |
|               | C-terminal,<br>241 aa | 41/58  | GilM, <i>S. griseoflavus</i>         | AAP69591     | Unknown                                  |
| <i>ravX7</i>  | 126                   | -      | -                                    | -            | Hypothetical protein                     |
| <i>ravW</i>   | 247                   | 37/46  | <i>Arthrobacter aurescens</i><br>TC1 | YP_950015    | N-acetyltransferases                     |
| <i>ravX8</i>  | 564                   | 59/74  | <i>S. griseus</i>                    | YP_001827711 | Hypothetical protein                     |

<sup>[a]</sup>: number of amino acids of corresponding enzymes ; <sup>[b]</sup>: identity/similarity; aa: amino acids

**Table S2.** ORFs and proposed function of corresponding enzymes

| ORFs            | Size <sup>[a]</sup> | ID/SM (%) <sup>[b]</sup> | Closest homologue of corresponding enzyme     | Protein accession no. | Proposed function                           |
|-----------------|---------------------|--------------------------|-----------------------------------------------|-----------------------|---------------------------------------------|
| <i>chryX</i>    | 149                 | 84/89                    | <i>S. griseoflavus</i> Tu 4000                | ZP_05536903           | Spore-associated protein precursor          |
| <i>chryF</i>    | 261                 | 71/83                    | FabG, <i>S. echinatus</i>                     | ABL09955              | Ketoreductase                               |
| <i>chryV</i>    | 110                 | 31/52                    | GilV, <i>S. griseoflavus</i>                  | ABE03981              | Hypothetical Protein                        |
| <i>chryH</i>    | 189                 | 62/73                    | <i>Kribbella flavida</i> DSM 17836            | ZP_03859638           | Oxidoreductase/NADH-dependent FMN Reductase |
| <i>chryOI</i>   | 513                 | 59/70                    | PgaE, <i>Streptomyces</i> sp. PGA64           | 2QA1_A                | FAD-Dependent Monooxygenase                 |
| <i>chryG</i>    | 109                 | 70/83                    | OvmC, <i>S. antibioticus</i>                  | CAG14964              | Cyclase                                     |
| <i>chryC1</i>   | 83                  | 58/71                    | SimA3, <i>S. antibioticus</i>                 | AAL15582              | Acyl Carrier Protein                        |
| <i>chryK</i>    | 314                 | 61/71                    | Tfu_1222, <i>Thermobifida fusca</i> YX        | YP_289283             | Bifunctional Cyclase/Dehydratase            |
| <i>chryOIV</i>  | 491                 | 55/63                    | OvmOII, <i>S. antibioticus</i>                | CAG14970              | FAD-Dependent Monooxygenase                 |
| <i>chryA</i>    | 422                 | 79/87                    | Pd2A, <i>Streptomyces</i> sp. WP 4669         | AAO65362              | Ketoacyl Synthase (KS $\alpha$ )            |
| <i>chryB</i>    | 402                 | 70/82                    | UrdB, <i>S. fradiae</i>                       | CAA60570              | Chain Length Factor (KS $\beta$ )           |
| <i>chryC</i>    | 87                  | 60/70                    | Acp, <i>S. venezuelae</i>                     | AAB36564              | Acyl Carrier Protein                        |
| <i>chryOIII</i> | 394                 | 71/80                    | GilOIII, <i>S. griseoflavus</i>               | AAP69584              | Cytochrome P-450 Monooxygenase              |
| <i>chryY</i>    | 62                  | 44/62                    | FdxD, <i>Mycobacterium tuberculosis</i> H37rv | NP_218020             | Ferredoxin                                  |
| <i>chryP</i>    | 322                 | 49/63                    | PgaH, <i>Streptomyces</i> sp. PGA64           | AAK57533              | Malonyl-CoA Carrier Protein Transacylase    |
| <i>chryQ</i>    | 327                 | 49/58                    | AknF, <i>S. galileus</i>                      | AAF70110              | Propionyl-CoA Carrier Protein Transacylase  |
| <i>chryX1</i>   | 265                 | 38/50                    | AurIO, <i>S. aureofaciens</i>                 | AAK59995              | Regulator                                   |

|                |                       |        |                                                              |              |                                         |
|----------------|-----------------------|--------|--------------------------------------------------------------|--------------|-----------------------------------------|
| <i>chryX2</i>  | 201                   | 56/72  | Gra-orf10, <i>S. violaceoruber</i>                           | CAA09631     | Two-Component Response Regulator        |
| <i>chryE</i>   | 328                   | 77/84  | SSDG_01263, <i>S. pristinaespiralis</i> ATCC 25486           | YP_002200633 | TDP-glucose-4,6-dehydratase             |
| <i>chryD</i>   | 355                   | 78/90  | SSEG_09374, <i>S. sviveus</i> ATCC 29083                     | YP_002205669 | Glucose-1-phosphate thymidyltransferase |
| <i>chryJ</i>   | 570                   | 75/84  | SGR_4823, <i>S. griseus</i> subsp. <i>griseus</i> NBRC 13350 | YP_001826335 | Major facilitator superfamily permease  |
| <i>chryX3</i>  | 193                   | 71/82  | SGR_4824, <i>S. griseus</i> subsp. <i>griseus</i> NBRC 13350 | YP_001826336 | MarR family transcriptional regulator   |
| <i>chryGT</i>  | 379                   | 44/62  | GilGT, <i>S. griseoflavus</i>                                | AAP69578     | C-glycosyltransferase                   |
| <i>chryMT</i>  | 340                   | 49/63  | MetLA1, <i>S. tubercidicus</i>                               | AAT45282     | O-methyltransferase                     |
| <i>chryOII</i> | 236                   | 65/76  | GilOII, <i>S. griseoflavus</i>                               | AAP69583     | Anthrone Monooxygenase                  |
| <i>chryRM</i>  | 761                   |        |                                                              |              |                                         |
|                | N-terminal<br>518 aa. | 52/67; | ORF 22, <i>S. echinatus</i>                                  | ABL09969/    | Oxidoreductase                          |
|                | C-terminal<br>243 aa. | 41/58  | GilM, <i>S. griseoflavus</i>                                 | AAP69591     | Thiopurine-S-methyltransferase          |
| <i>chryU</i>   | 302                   | 46/55  | AceI_0416, <i>Acidothermus cellulolyticus</i> 11B            | YP_872176    | TDP-4-dehydrorhamnose ketoreductase     |
| <i>chryCMT</i> | 411                   | 61/72  | PCZA361, <i>Amycolatopsis orientalis</i>                     | CAA11777     | C-methyltransferase                     |
| <i>chryX4</i>  | 309                   | 61/75  | Tfu_1012, <i>Thermobifida fusca</i> YX                       | YP_289073    | Hexokinase                              |
| <i>chryL</i>   | 210                   | 37/50  | GilL, <i>S. Griseoflavus</i>                                 | AAP69590     | NAD-dependent epimerase/dehydratase     |
| <i>chryX5</i>  | 204                   | 70/83  | <i>S. griseus griseus</i> NBRC 13350                         | YP_001824391 | TetR Family Regulator                   |
| <i>chryX6</i>  | 135                   | 70/82  | SGR_2879, <i>S. griseus</i> subsp. <i>griseus</i> NBRC 13350 | YP_001824391 | TetR Family transcriptional regulator   |
| <i>chryX7</i>  | 120                   | 61/74  | SC2H2.18, <i>S. coelicolor</i> A3(2)                         | NP_631661    | Hypothetical Protein                    |
| <i>chryX8</i>  | 202                   | 78/83  | SGR_429, <i>S. griseus</i>                                   | YP_001821941 | TetR Family regulator                   |
| <i>chryX9</i>  | 545                   | 83/89  | SSDG_02680, <i>S. pristinaespiralis</i> ATCC 25486           | YP_002198950 | Acyl-CoA Dehydrogenase                  |

<sup>[a]</sup>: number of amino acids in corresponding enzymes; <sup>[b]</sup>: identity/similarity

**Table S3.** Bacterial strains and the plasmids used in this study

| Strain/ plasmid no.                | Strain/ plasmid                                              | Characteristics and relevance                                                                                                                                               | References |
|------------------------------------|--------------------------------------------------------------|-----------------------------------------------------------------------------------------------------------------------------------------------------------------------------|------------|
| 1                                  | <i>E. coli</i> XL1-Blue-MRF                                  | Host for routine cloning works and for the construction of genomic libraries                                                                                                | Stratagene |
| 2                                  | <i>E. coli</i> ET12567/pUZ8002                               | Host for conjugal transfer of plasmid into <i>Streptomyces</i>                                                                                                              | [1]        |
| <b><i>Streptomyces</i> species</b> |                                                              |                                                                                                                                                                             |            |
| 3                                  | <i>S. ravidus</i> C23201                                     | Ravidomycin producer-wild strain                                                                                                                                            | Wyeth      |
| 4                                  | <i>S. albaduncus</i> AD819                                   | Chrysomycin producer-wild strain                                                                                                                                            | Wyeth      |
| 5                                  | <i>S. lividans</i> TK24                                      |                                                                                                                                                                             |            |
| 6                                  | <i>S. lividans</i> TK24/cosG9B3-GT <sup>-</sup>              | Produces defucoGE and defucoGM-the strain harbors the GilGT deleted mutant cosmid cosG9B3-GilGT <sup>-</sup>                                                                | [2]        |
| 7                                  | <i>S. lividans</i> TK24/cosG9B3-OIII <sup>-</sup>            | Produces defucoGE and defucoGM-the strain harbors the GilOIII deleted mutant cosmid cosG9B3-OIII <sup>-</sup>                                                               | [2]        |
| 8                                  | <i>S. lividans</i> TK24/cosG9B3-OII <sup>-</sup>             | Produces dehydrorabelomycin, dehydro-homo-rabelomycin and -the strain harbors the GilOII deleted mutant cosmid cosG9B3-OII <sup>-</sup>                                     | [3]        |
| 9                                  | <i>S. lividans</i> TK24/cosG9B3-OIV <sup>-</sup>             | Produces rabelomycin and homorabelomycin-the strain harbors the GilOIV deleted mutant cosmid cosG9B3-OIV <sup>-</sup>                                                       | [4]        |
| 10                                 | <i>S. lividans</i> TK24/cosRav32                             | Produces 2,3-dehydroUWM6, 2,3-dehydro-HomoUWM6, preGM-O-quinone, preGV-O-quinone, 4'-O-deacetylraavidomycin M, 4'-O-deacetylraavidomycin E -the strain harbors the cosRav32 | This work  |
| 11                                 | <i>S. lividans</i> TK24/cosG9B3-GT <sup>-</sup> /pRavGT      | Produces GE and GM-pRavGT was introduced into strain no. 6                                                                                                                  | This work  |
| 12                                 | <i>S. lividans</i> TK24/cosG9B3-OIII <sup>-</sup> /pRavOIII  | Produces GV and GM-pRavOIII was introduced into strain no. 7                                                                                                                | This work  |
| 13                                 | <i>S. lividans</i> TK24/cosG9B3-OIII <sup>-</sup> /pChryOIII | Produces GV, GE and GM-pChryOIII was introduced into strain no. 7                                                                                                           | This work  |
| 14                                 | <i>S. lividans</i> TK24/cosG9B3-OII <sup>-</sup> /pChryOII   | Produces GV, GE and GM -pChryOII was introduced into strain no. 8                                                                                                           | This work  |
| 15                                 | <i>S. lividans</i> TK24/cosG9B3-OIV <sup>-</sup> /pChryOIV   | Produces GV and GM-pChryOIV was introduced into strain no. 9                                                                                                                | This work  |
| <b>Plasmids/cosmids</b>            |                                                              |                                                                                                                                                                             |            |
| 16                                 | pOJ446                                                       | Vector for cosmid library construction                                                                                                                                      | [5]        |
| 17                                 | cosRav32                                                     | Entire ravidomycin gene cluster cloned into pOJ446                                                                                                                          | This work  |
| 18                                 | cosChry1-1                                                   | Partial chrysomycin gene cluster cloned into pOJ446                                                                                                                         | This work  |
| 19                                 | cosChryF2                                                    | Partial chrysomycin gene cluster cloned into pOJ446.                                                                                                                        | This work  |

|    |                   |                                                                                                                    |            |
|----|-------------------|--------------------------------------------------------------------------------------------------------------------|------------|
| 20 | pEM4              |                                                                                                                    | [6]        |
| 21 | pUWL201PW         | <i>E. coli-Streptomyces</i> shuttle plasmid that contains ermEp*for the expression of genes in <i>Streptomyces</i> | [7]        |
| 22 | pRavGT            | <i>ravGT</i> cloned into pUWL201PW                                                                                 | This work  |
| 23 | pRavOIII          | <i>ravOIII</i> cloned into pEM4                                                                                    | This work  |
| 24 | pChryOIV          | <i>chryOIV</i> cloned into pEM4                                                                                    | This work  |
| 25 | pChryOIII         | <i>chryOIII</i> cloned into pEM4                                                                                   | This work  |
| 26 | pChryOII          | <i>chryOII</i> cloned into pEM4                                                                                    | This work  |
| 27 | PCR-Blunt-II-TOPO | To clone PCR products                                                                                              | Invitrogen |

**Table S4.** Oligo primers used in this study

| Oligo's name | Oligonucleotide sequence                |
|--------------|-----------------------------------------|
| ChryOII_for  | 5'-ATTCTAGACCACCCGTACCGAGCCAC-3'        |
| ChryOII_rev  | 5'-ATGAAATCCCCGTCGTCCGCCGCGCG-3'        |
| ChryOIII_for | 5'-ATTCTAGAGACCCGTTCCCGCAGCTC-3'        |
| ChryOIII_rev | 5'-ATGAAATTCGAACACGAAGGCTGTCGT-3'       |
| ChryOIV_for  | 5'-GCGGTTCAGACCGCGCGCACCGGCTGCCCGGG-3'  |
| ChryOIV_rev  | 5'-CCGGTGAATTCACAGGAATCCGATGGCGGT-3'    |
| CM_cons_F1   | 5'-GCCCTVGTSAACSGGNGNACCAGY-3'          |
| CM_cons_R1   | 5'-GTTGCCVAGNCCGCCGCASACGTT-3'          |
| RavOIII_for  | 5'-AAGTCTAGAAGGAGACGGAGCACCATGGCG-3'    |
| RavOIII_rev  | 5'-CGGAATTCCTCTGCTCGTCGGCCGTGGTCACGT-3' |
| RavGT_for    | 5'-ATCATATGAAAGTCCTGTTTCATCGCAGCGGGA-3' |
| RavGT_rev    | 5'-ATGAAATTCATCCGCGCACCCAGTCCTTCCAG-3'  |
| KS_probe_for | 5'-GTSTCSACSGGSTGYACSTCSGGS-3'          |
| KS_probe_rev | 5'-SCCGATSGCSCCSAGSGARTGSCC-3'          |
| DH_probe_for | 5'-CSGGSGSSGCSGGSTTCATSGG-3'            |
| DH_probe_rev | 5'-CAGTGGTCSACGTGSAGCCACTCSCG-3'        |

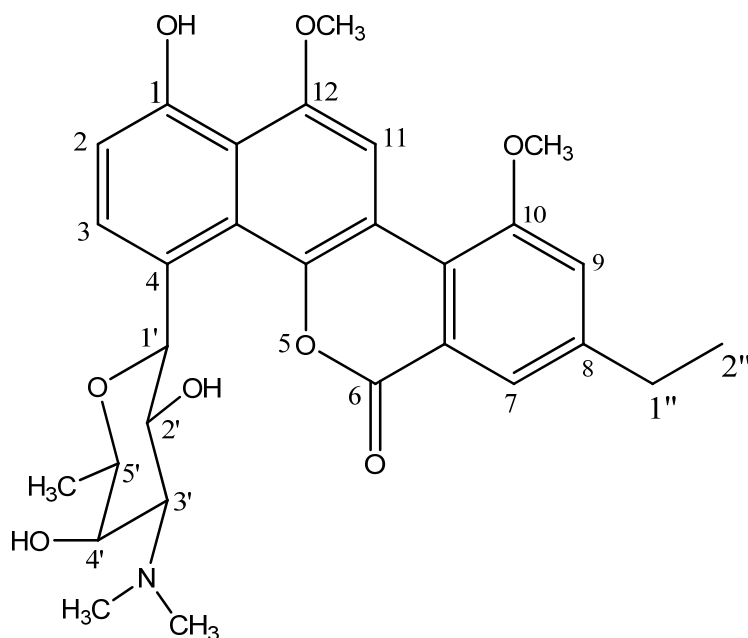

**$^1\text{H}$  and  $^{13}\text{C}$  NMR data of deacetylravidomycin E (31):**  $^1\text{H}$  NMR ( $\text{CDCl}_3$ , 300 MHz)  $\delta$  9.83 (br, s, 1H, -OH1,  $\text{D}_2\text{O}$  exchangeable) 8.51 (s, 1H, H11), 7.97 (d,  $J = 9.0$  Hz, 1H, H3), 7.95 (d,  $J = 3.3$  Hz, 1H, H7), 7.25 (d,  $J = 3.3$  Hz, 1H, H9), 7.08 (d,  $J = 9.0$  Hz, 1H, H2), 6.01 (d,  $J = 9.0$  Hz, 1H, H1'), 4.44 (t,  $J = 9.0$  Hz, 1H, H2'), 4.16 - 4.26 (m, 2H, H4', H5'), 4.15 (s, 3H, 12-OMe), 4.12 (s, 3H, 10-OMe), 3.35 (dd,  $J = 9.0, 3.0$  Hz, 1H, H3'), 2.95 (s, 6H, 3'-N(Me) $_2$ ), 2.83 (q,  $J = 7.5$  Hz, 2H, H1''), 1.32 (t,  $J = 7.5$  Hz, 3H, H2'') 1.31 (d,  $J = 6.0$  Hz, 3H, 6'-Me);  $^{13}\text{C}$  NMR ( $\text{CDCl}_3$ , 75 MHz)  $\delta$  170.2, 161.0, 157.5, 155.0, 152.5, 146.8, 129.8, 125.3, 124.7, 122.4, 122.4, 121.3, 117.7, 116.0, 114.5, 113.0, 102.8, 79.8, 78.5, 71.6, 69.6, 68.8, 68.4, 56.6, 43.1, 29.2, 16.95, 15.37.



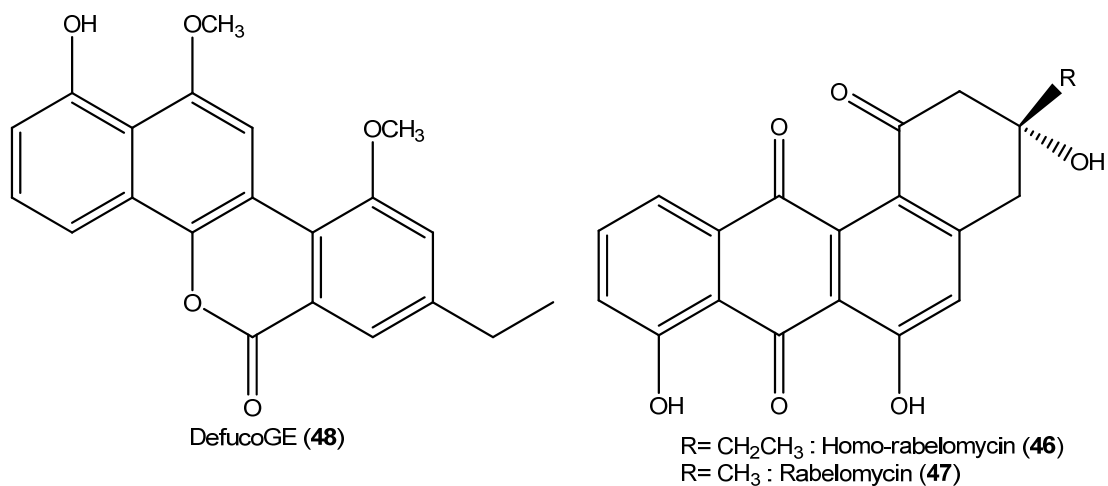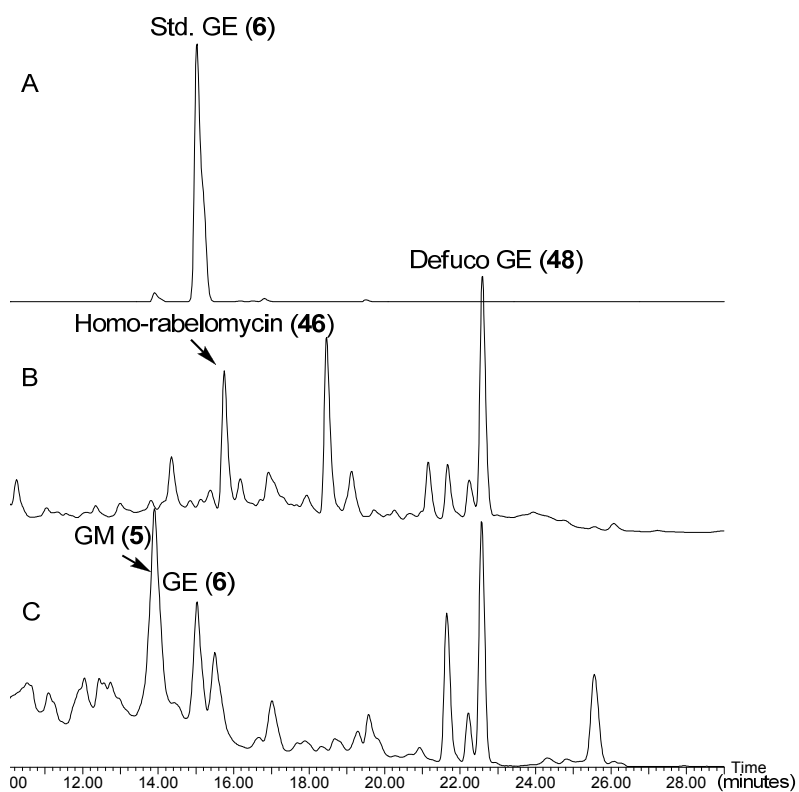

**Figure S1.** HPLC analyses of the compounds: A, standard GE; B, metabolites from the *S. lividans* TK24(cosG9B3-GilGT<sup>-</sup>) mutant; C, metabolites from the *S. lividans* TK24(cosG9B3-GilGT<sup>-</sup>/pRavGT).

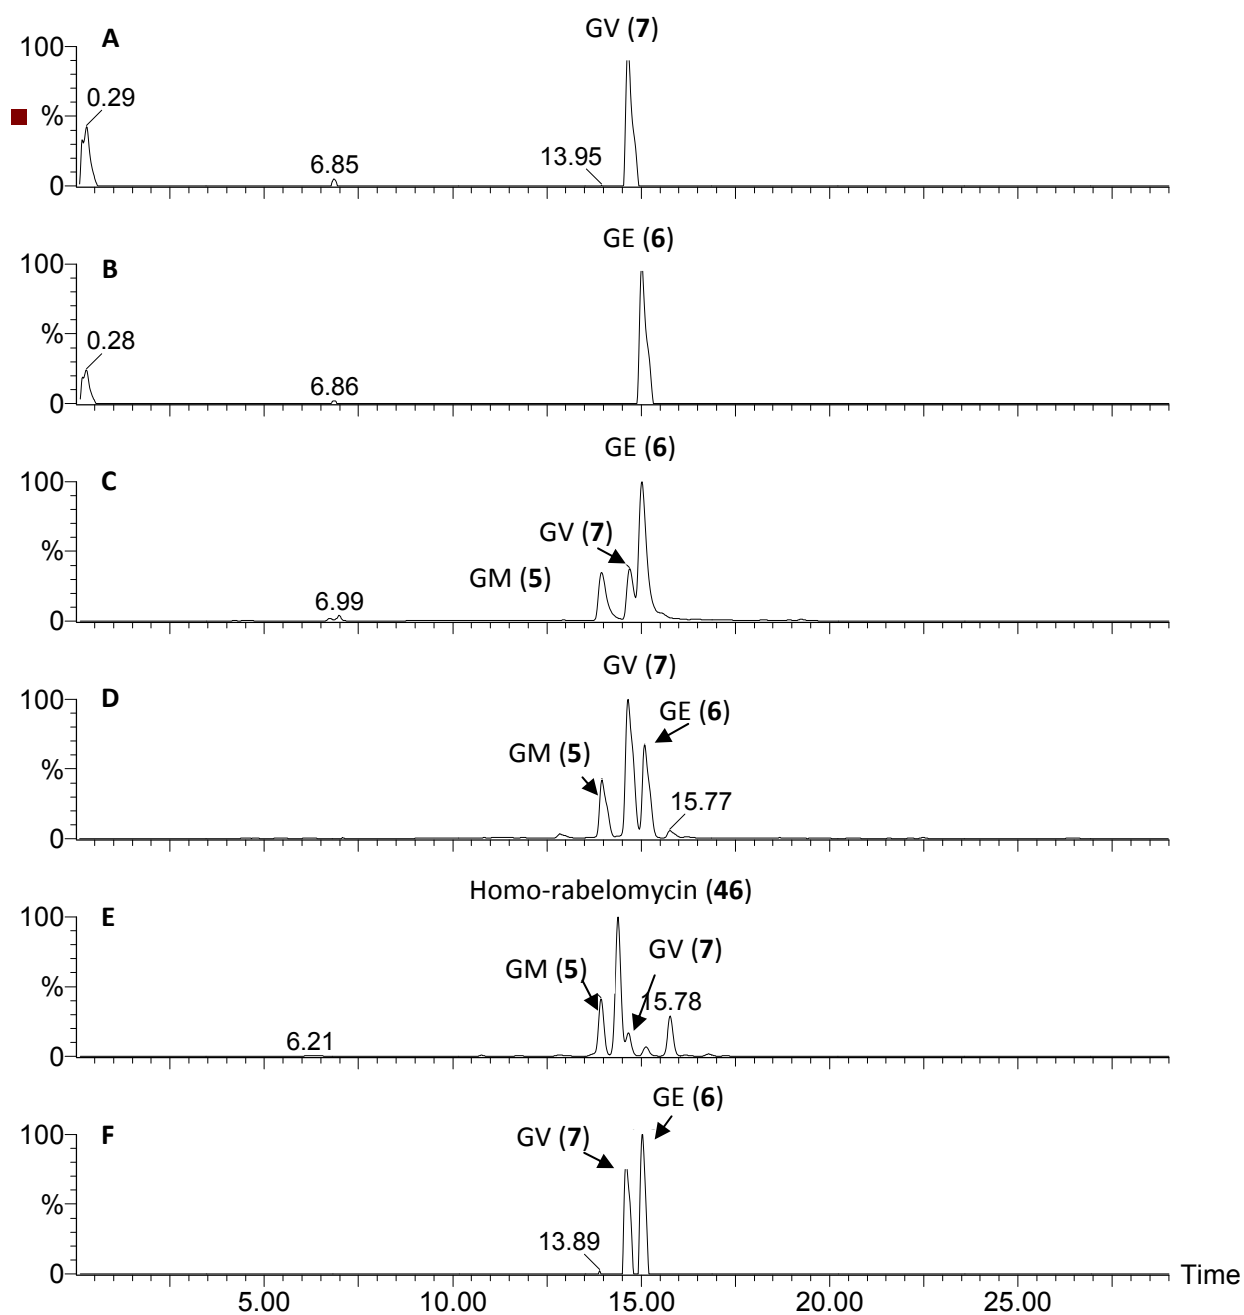

**Figure S2.** HPLC analyses of the metabolites: trace A, gilvocarcin V (Rt. 14.65 min) isolated from *S. lividans* TK24(cosG9B3); trace B, gilvocarcin E (Rt. 15.03 min) isolated from the *S. lividans* TK24(cosG9B3-GilOIII<sup>-</sup>) mutant; trace C, metabolites isolated from the *S. lividans* TK24(cosG9B3-GilOIII<sup>-</sup>/pRavOIII) mutant; trace D, metabolites isolated from the *S. lividans* TK24(cosG9B3-GilOIII<sup>-</sup>/pChryOIII) mutant; trace E, metabolites isolated from the *S. lividans* TK24(cosG9B3-GilOIV<sup>-</sup>/pChryOIV) mutant; trace F, metabolites isolated from the *S. lividans* TK24(cosG9B3-GilOII<sup>-</sup>/pChryOII) mutant. Arrows indicate the important metabolites. Y and X axes represent relative absorbance and retention time (in minutes), respectively.

|           |       | 1                                                                                                                                                                                                | 50  |
|-----------|-------|--------------------------------------------------------------------------------------------------------------------------------------------------------------------------------------------------|-----|
| CosH      | (1)   | -MNLV <b>TCAGFIGSHF</b> VRTL <b>LSGGY</b> PGHEDDR <b>VT</b> VLD <b>KLTYAC</b> TLN <b>NLP</b>                                                                                                     |     |
| RhoH      | (1)   | -MNI <b>PVTCAGFIGSHF</b> VRTL <b>LSGGY</b> PGHEDDR <b>VT</b> V <b>VD</b> KLTYAC <b>TLN</b> NLP                                                                                                   |     |
| Gra-ORF17 | (1)   | -MRL <b>LVTCAGFIGSHY</b> VEI <b>LAGS</b> Y <b>PESDD</b> VH <b>VT</b> V <b>VR</b> KLTYAC <b>RRD</b> NLP                                                                                           |     |
| LanHI4    | (1)   | MK <b>LIITCAGFIGSHY</b> VRTL <b>LN</b> DG <b>YEDW</b> KGAH <b>VT</b> VLD <b>KLTYAC</b> N <b>RD</b> NLP                                                                                           |     |
| SchS5     | (1)   | -MRL <b>LVTCAGFIGSHF</b> VRTL <b>LV</b> EGSY <b>SGWED</b> MQ <b>VT</b> AL <b>KLTYAC</b> N <b>RD</b> NLP                                                                                          |     |
|           |       | 51                                                                                                                                                                                               | 100 |
| CosH      | (50)  | RA <b>HPRLTFVHGDI</b> CBTT <b>LL</b> DKVF <b>PCHE</b> AVV <b>HFAE</b> S <b>HVDR</b> SVAGAE <b>FVR</b>                                                                                            |     |
| RhoH      | (50)  | PR <b>HPRLTFVHGDI</b> CBTP <b>LL</b> GKVF <b>PCHE</b> AVV <b>HFAE</b> S <b>HVDR</b> SVAGAE <b>FVR</b>                                                                                            |     |
| Gra-ORF17 | (50)  | EA <b>HPRLDFVHGDI</b> CD <b>RD</b> LL <b>DRVL</b> PG <b>HD</b> AVV <b>HFAE</b> S <b>HVDR</b> SLTG <b>PGF</b> FVR                                                                                 |     |
| LanHI4    | (51)  | EA <b>HPRLTFVHGDI</b> CBFE <b>LL</b> LELL <b>PGH</b> AVV <b>HFAE</b> S <b>HVDR</b> SLES <b>AEF</b> VH                                                                                            |     |
| SchS5     | (50)  | AS <b>HERLVEVRGD</b> VCD <b>RKLL</b> REL <b>VP</b> GH <b>DA</b> AVV <b>HFAE</b> T <b>HVDR</b> SLE <b>GAGD</b> E <b>FR</b>                                                                        |     |
|           |       | 101                                                                                                                                                                                              | 150 |
| CosH      | (100) | T <b>NVLG</b> TQ <b>ALL</b> EA <b>LR</b> HGIC <b>VEFV</b> Q <b>VST</b> DE <b>TYG</b> SI <b>AE</b> CS <b>WTE</b> DE <b>PL</b> LPNS <b>PFY</b>                                                     |     |
| RhoH      | (100) | T <b>NVLG</b> TQ <b>ALL</b> EA <b>LR</b> HGIC <b>VEFV</b> Q <b>VST</b> DE <b>TYG</b> SI <b>AE</b> CS <b>WTE</b> DE <b>PL</b> LPNS <b>PFY</b>                                                     |     |
| Gra-ORF17 | (100) | T <b>NMG</b> TQ <b>QLD</b> RA <b>LH</b> AG <b>VDR</b> V <b>LHV</b> ST <b>DEV</b> Y <b>G</b> SL <b>DS</b> CT <b>WTE</b> DS <b>PL</b> LPNS <b>PFY</b>                                              |     |
| LanHI4    | (101) | T <b>NVT</b> G <b>TQ</b> RL <b>DA</b> V <b>L</b> AT <b>R</b> V <b>KRV</b> V <b>HV</b> ST <b>DEV</b> Y <b>G</b> SI <b>DEC</b> SW <b>TE</b> EW <b>PL</b> APNS <b>PFY</b>                           |     |
| SchS5     | (100) | T <b>NVLG</b> TQ <b>TL</b> DA <b>V</b> L <b>D</b> SG <b>VER</b> V <b>VH</b> ST <b>DEV</b> Y <b>G</b> SI <b>DEC</b> SW <b>TE</b> EW <b>PL</b> APNS <b>PFY</b>                                     |     |
|           |       | 151                                                                                                                                                                                              | 200 |
| CosH      | (150) | RA <b>SKA</b> SAD <b>LI</b> ARS <b>YVRT</b> H <b>GLD</b> V <b>RIT</b> RC <b>ANN</b> Y <b>GP</b> Q <b>HPE</b> K <b>LIP</b> LE <b>FV</b> RL <b>LD</b>                                              |     |
| RhoH      | (150) | RA <b>SKA</b> SAD <b>LI</b> ARS <b>YVRT</b> H <b>GLD</b> V <b>RVT</b> RC <b>ANN</b> Y <b>GP</b> Q <b>HPE</b> K <b>LIP</b> LE <b>FV</b> RL <b>LD</b>                                              |     |
| Gra-ORF17 | (150) | RA <b>SKA</b> ST <b>TWS</b> RA <b>PTT</b> V <b>R</b> H <b>GLD</b> V <b>RIT</b> RC <b>SNN</b> Y <b>GP</b> Q <b>HPE</b> K <b>LIP</b> LE <b>FV</b> RL <b>LD</b>                                     |     |
| LanHI4    | (151) | SA <b>SKA</b> AS <b>DL</b> ARS <b>YVRT</b> H <b>GLD</b> L <b>SIT</b> RC <b>SNN</b> Y <b>GP</b> Q <b>HPE</b> K <b>LIP</b> LE <b>FV</b> RL <b>LD</b>                                               |     |
| SchS5     | (150) | RA <b>SKA</b> GS <b>DL</b> V <b>RAY</b> V <b>RS</b> H <b>CV</b> D <b>L</b> SIT <b>RC</b> SNN <b>Y</b> GP <b>Q</b> H <b>PE</b> K <b>LIP</b> LE <b>FV</b> RL <b>LD</b>                             |     |
|           |       | 201                                                                                                                                                                                              | 250 |
| CosH      | (200) | G <b>QP</b> V <b>PLY</b> CD <b>EN</b> L <b>RE</b> WL <b>HVDD</b> H <b>CA</b> VR <b>L</b> V <b>L</b> D <b>GR</b> PC <b>GE</b> V <b>YN</b> V <b>GGC</b> TH <b>L</b> T <b>NK</b>                    |     |
| RhoH      | (200) | G <b>QP</b> V <b>PLY</b> CD <b>EN</b> L <b>RE</b> WL <b>HVDD</b> H <b>CA</b> VR <b>L</b> V <b>L</b> D <b>GR</b> PC <b>GE</b> V <b>YN</b> V <b>GGC</b> TH <b>L</b> T <b>NK</b>                    |     |
| Gra-ORF17 | (200) | G <b>RQ</b> V <b>PLY</b> CD <b>GR</b> N <b>V</b> RE <b>WL</b> H <b>VDD</b> H <b>CR</b> AL <b>Q</b> L <b>V</b> L <b>T</b> K <b>R</b> AG <b>ET</b> Y <b>N</b> I <b>GGC</b> SG <b>M</b> S <b>NR</b> |     |
| LanHI4    | (201) | G <b>EQ</b> V <b>PLY</b> CD <b>GN</b> I <b>RE</b> WL <b>HVDD</b> H <b>CR</b> AI <b>D</b> L <b>V</b> L <b>N</b> K <b>R</b> AG <b>ET</b> Y <b>N</b> I <b>GGC</b> NE <b>Q</b> T <b>NR</b>           |     |
| SchS5     | (200) | G <b>RR</b> V <b>PLY</b> CD <b>GN</b> V <b>RE</b> WL <b>HVDD</b> H <b>CR</b> GI <b>D</b> L <b>V</b> L <b>N</b> Q <b>R</b> AG <b>ET</b> Y <b>N</b> I <b>GGC</b> NE <b>R</b> T <b>NL</b>           |     |
|           |       | 251                                                                                                                                                                                              | 300 |
| CosH      | (250) | EM <b>TGR</b> L <b>LAL</b> C <b>GR</b> D <b>W</b> DL <b>VRR</b> V <b>ADR</b> NC <b>HD</b> FR <b>Y</b> AV <b>DD</b> S <b>KIR</b> REL <b>GY</b> AP <b>W</b> S <b>L</b> E                           |     |
| RhoH      | (250) | EM <b>TGR</b> L <b>LAL</b> C <b>GR</b> D <b>W</b> DL <b>VQR</b> V <b>ADR</b> NC <b>HD</b> FR <b>Y</b> AV <b>DD</b> S <b>KIR</b> REL <b>GY</b> AP <b>W</b> S <b>L</b> E                           |     |
| Gra-ORF17 | (250) | EM <b>TAR</b> L <b>LDL</b> L <b>CAD</b> W <b>D</b> V <b>R</b> H <b>Q</b> E <b>DR</b> L <b>C</b> HD <b>FR</b> Y <b>AI</b> DD <b>S</b> K <b>IR</b> E <b>L</b> GY <b>AP</b> W <b>S</b> L <b>E</b>   |     |
| LanHI4    | (251) | RI <b>TER</b> L <b>LAL</b> E <b>T</b> Q <b>D</b> W <b>S</b> K <b>VR</b> H <b>VP</b> DR <b>KA</b> HD <b>FR</b> Y <b>SL</b> DE <b>S</b> K <b>IR</b> E <b>L</b> GY <b>AP</b> RI <b>TFE</b>          |     |
| SchS5     | (250) | RI <b>TE</b> Q <b>L</b> LE <b>IT</b> C <b>AGA</b> E <b>RI</b> Q <b>R</b> V <b>PR</b> DR <b>KA</b> HD <b>FR</b> Y <b>S</b> IE <b>T</b> K <b>IR</b> E <b>L</b> GY <b>AP</b> RI <b>GF</b> E         |     |
|           |       | 301                                                                                                                                                                                              | 329 |
| CosH      | (300) | D <b>GL</b> RET <b>VE</b> W <b>Y</b> AA <b>HR</b> DH <b>W</b> D <b>ARE</b> EG <b>GA</b> DE <b>GC</b> Y <b>-</b>                                                                                  |     |
| RhoH      | (300) | D <b>GL</b> RET <b>VE</b> W <b>Y</b> AA <b>HR</b> DH <b>W</b> D <b>ARE</b> EG <b>GD</b> GC <b>Y</b> -                                                                                            |     |
| Gra-ORF17 | (300) | S <b>GL</b> GA <b>V</b> W <b>Y</b> RD <b>HP</b> DE <b>WR</b> AP <b>S</b> -                                                                                                                       |     |
| LanHI4    | (301) | Q <b>GL</b> AD <b>T</b> V <b>W</b> Y <b>HD</b> N <b>PG</b> W <b>K</b> CT <b>K</b> KN <b>Q</b> C <b>---</b>                                                                                       |     |
| SchS5     | (300) | Q <b>GL</b> A <b>E</b> T <b>V</b> W <b>Y</b> RD <b>NP</b> D <b>W</b> K <b>AA</b> K <b>H</b> GT <b>D</b> RA <b>V</b> A                                                                            |     |

**Figure S3.** Multiple sequence alignment of 4,6-dehydratases used for designing degenerate primers (DH\_prob\_for and DH\_prob\_rev): solid arrows indicate the amino acid residues used in this study; the dotted arrow represents the original amino acid sequence region used by Bechthold et al. for the reverse primer<sup>[8]</sup>

## References

- [1] D. J. Macneil, J. L. Occi, K. M. Gewain, T. Macneil, P. H. Gibbons, C. L. Ruby, S. J. Danis, *Gene* **1992**, *115*, 119.
- [2] T. Liu, M. K. Kharel, C. Fischer, A. McCormick, J. Rohr, *Chembiochem* **2006**, *7*, 1070.
- [3] M. K. Kharel, L. L. Zhu, T. Liu, J. Rohr, *J. Am. Chem. Soc.* **2007**, *129*, 3780.
- [4] T. Liu, C. Fischer, C. Beninga, J. Rohr, *J. Am. Chem. Soc.* **2004**, *126*, 12262.
- [5] M. Bierman, R. Logan, K. O'Brien, E. T. Seno, R. N. Rao, B. E. Schoner, *Gene* **1992**, *116*, 43.
- [6] L. M. Quiros, I. Aguirrezabalaga, C. Olano, C. Mendez, J. A. Salas, *Mol. Microbiol.* **1998**, *28*, 1177.
- [7] M. Doumith, P. Weingarten, U. F. Wehmeier, K. Salah-Bey, B. Benhamou, C. Capdevila, J. M. Michel, W. Piepersberg, M. C. Raynal, *Mol. Gen. Genet.* **2000**, *264*, 477.
- [8] H. Decker, S. Gaisser, S. Pelzer, P. Schneider, L. Westrich, W. Wohlleben, A. Bechthold, *FEMS Microbiol. Lett.* **1996**, *141*, 195.
